# Supplementary material
Source: PubMed Central journal article supplement (PMC9536325)
Supplement: NIHMS1834594-supplement-2.pdf [file NIHMS1834594-supplement-2.pdf]

**Table S1. Baseline Characteristics of Participants that Completed vs Dropped Out, Related to Table 1**

| Baseline Characteristics          | All completers (n=137) | Dropouts (n=12) | Pearson Chi-Sq (p-value) | Chi-Sq, asymptotic significance/2-sided (p-value) | Independent T-test (p-value)<br>Equal variances assumed |
|-----------------------------------|------------------------|-----------------|--------------------------|---------------------------------------------------|---------------------------------------------------------|
| Age, mean (SD), years             | 40.36 (9.04)           | 41.42 (11.26)   | -                        | -                                                 | 0.704                                                   |
| Male, n, (%)                      | 125 (91%)              | 11 (92%)        | 0.017                    | 0.895                                             | -                                                       |
| Female, n, (%)                    | 12 (9%)                | 1 (8%)          |                          |                                                   | -                                                       |
| White                             | 82 (60%)               | 10 (83%)        | 4.465                    | 0.614                                             | -                                                       |
| Black                             | 5 (4%)                 | 0 (0%)          |                          |                                                   | -                                                       |
| Asian                             | 5 (4%)                 | 1 (8%)          |                          |                                                   | -                                                       |
| Hispanic                          | 21 (15%)               | 0 (0%)          |                          |                                                   | -                                                       |
| Mixed Race                        | 2 (1%)                 | 0 (0%)          |                          |                                                   | -                                                       |
| Unknown Race                      | 22 (16%)               | 1 (8%)          |                          |                                                   | -                                                       |
| 95% Eating Window                 | 14.09 (1.60)           | 14.14 (2.76)    | -                        | -                                                 | 0.926                                                   |
| Fasting Glucose, mean (SD), mg/dL | 92.41 (7.69)           | 94.58 (9.61)    | -                        | -                                                 | 0.359                                                   |
| HbA1c, mean (SD)                  | 5.29 (0.36)            | 5.43 (0.33)     | -                        | -                                                 | 0.216                                                   |
| HOMA-IR, mean (SD)                | 1.11 (0.74)            | 1.63 (1.06)     | -                        | -                                                 | 0.027                                                   |
| Fasting Insulin, mean (SD), mIU/L | 4.80 (3.00)            | 6.83 (4.09)     | -                        | -                                                 | 0.031                                                   |

HOMA-IR and insulin at baseline were the only main study outcomes that differed between participants who completed 3-months and those who dropped out. Demographics and other main study outcomes were not different between groups. The differences in HOMA-IR and insulin were magnified due to very large sample size differences and few outliers among the drop-out group.

**Table S2. Feasibility: 95% Eating Window and Adherence, Related to Figure 3**

| Study Period     | SOC |                              |                                     |                                         |                                   | TRE |                        |                                     |                                         |                                   |                                          |
|------------------|-----|------------------------------|-------------------------------------|-----------------------------------------|-----------------------------------|-----|------------------------|-------------------------------------|-----------------------------------------|-----------------------------------|------------------------------------------|
|                  | N   | Duration (No. days (95% CI)) | mCC app caloric entries (total No.) | Adherent logging (%; No. days (95% CI)) | 95% Eating window (hours, 95% CI) | N   | Duration (days)        | mCC app caloric entries (total No.) | Adherent logging (%; No. days (95% CI)) | 95% Eating window (hours, 95% CI) | Outside 10-h Eating Window (%; No. days) |
| Baseline         | 67  | 13.61 (13.46 to 13.76)       | 4354                                | 85%, 11.52 (10.99 to 12.06)             | 13.98 (13.56 to 14.41)            | 70  | 13.51 (13.30 to 13.72) | 4726                                | 85%, 11.51 (10.91 to 12.12)             | 14.19 (13.86 to 14.52)            | N/A                                      |
| 6-wk (wk 5-7)    | 65  | 14.00                        | 2785                                | 70%, 9.78 (9.01 to 10.56)               | 13.13 (12.66 to 13.60)            | 68  | 14.00                  | 2973                                | 68%, 9.51 (8.73 to 10.30)               | 10.68 (10.30 to 11.06)            | 21%, 2.91 (2.22 to 3.60)                 |
| 12-wk (wk 10-12) | 66  | 14.00                        | 3298                                | 77%, 10.71 (9.87 to 11.55)              | 13.35 (12.90 to 13.81)            | 66  | 14.00                  | 3354                                | 73%, 10.27 (9.48 to 11.06)              | 11.13 (10.73 to 11.53)            | 29%, 4.11 (3.19 to 5.02)                 |
| 12-wk-RS         | 67  | 14.00                        | 3195                                | 72%, 10.07 (9.43 to 10.72)              | 13.59 (13.17 to 14.01)            | 70  | 14.00                  | 3297                                | 73%, 10.23 (9.59 to 10.86)              | 11.09 (10.76 to 11.43)            | 27%, 3.74 (2.95 to 4.53)                 |

Data are presented as mean (95% CI) or % mean, No. (95% CI). 12-wk-RS was a random sample of 14 days of the 12-week intervention period with at least 1 food log. Adherent logging is defined as a minimum of 2 entries spanning at least 5 hours in a given day. Food logs that contain at least one food or beverage item with  $\geq 5$ Kcal energy content were included in analyses and are shown in the table. Logs of medication, water, or energy-free beverages such as herbal tea without sugar were excluded. Participants that had less than 5 days of at least 1 food log were excluded from the analysis. These exclusions were limited (SOC = 2 at 6-wk, and 1 at 12-wk; TRE = 2 at 6-wk, and 4 at 12-wk) and were a result of participants being deployed on special assignments such as strike teams. No participants were excluded from baseline or 12-wk-RS. Duration: Average number of days sampled for a given time period. mCC app caloric entries: Total number of caloric food or beverages entries for a given study period. 95% Eating window: The 95% interval of time that all caloric items were logged during a given study period. The earliest and latest 2.5% of entries were removed. Outside Eating window: Percent of days participants ate outside their designated eating interval by more than 15 mins in a given study period.

**Table S3. Alternative Baseline Values for Post Hoc Sub-analysis of Health Metrics, Related to Table 3**

| Outcome Measure                | Value at baseline | SOC |                              |                              |                           | TRE                           |    |                              |                              | Time x Group x Elevated Factor (SOC vs TRE) |                               | Time x Elevated Factor (Combined groups, elevated vs normal at baseline) |                |                   |
|--------------------------------|-------------------|-----|------------------------------|------------------------------|---------------------------|-------------------------------|----|------------------------------|------------------------------|---------------------------------------------|-------------------------------|--------------------------------------------------------------------------|----------------|-------------------|
|                                |                   | N   | Baseline                     | 12-wk                        | Change 12-wk - Baseline   | P-value Time x Elevated Value | N  | Baseline                     | 12-wk                        | Change 12-wk - Baseline                     | P-value Time x Elevated Value | Change Equal Variance                                                    | P-value        | P-value           |
| HbA1c, %                       | HbA1c ≥ 5.7       | 7   | 5.81<br>(5.63 to 6.00)       | 5.71<br>(5.46 to 5.97)       | -0.10<br>(-0.19 to -0.01) | 0.220                         | 7  | 6.07<br>(5.35 to 6.79)       | 5.56<br>(5.15 to 5.96)       | -0.51<br>(-0.97 to -0.06)                   | <b>2.14E-7***</b>             | -0.41<br>(-0.83 to 0.001)                                                | <b>0.003**</b> | <b>3.00E-6***</b> |
| Systolic Blood Pressure, mmHg  | ≥ 120 mm Hg       | 35  | 126.92<br>(124.62 to 129.23) | 122.95<br>(119.90 to 126.01) | -3.97<br>(-7.10 to -0.84) | <b>0.001**</b>                | 37 | 129.00<br>(126.74 to 131.26) | 124.27<br>(121.15 to 127.39) | -4.73<br>(-7.63 to -1.83)                   | <b>0.002**</b>                | -0.76<br>(-4.94 to 3.43)                                                 | 0.715          | <b>4.00E-6***</b> |
| Diastolic Blood Pressure, mmHg | ≥ 80 mm Hg        | 17  | 84.84<br>(82.39 to 87.29)    | 80.24<br>(75.59 to 84.88)    | -4.61<br>(-8.86 to -0.35) | 0.056                         | 22 | 84.83<br>(82.98 to 86.69)    | 77.59<br>(76.97 to 81.21)    | -7.24<br>(-11.25 to -3.24)                  | <b>1.35E-4***</b>             | -2.64<br>(-8.34 to 3.07)                                                 | 0.239          | <b>6.30E-5***</b> |
| LDL Cholesterol, mg/dL         | ≥ 100 mg/dL       | 49  | 134.29<br>(126.95 to 141.62) | 131.08<br>(123.44 to 138.73) | -3.20<br>(-9.36 to 2.95)  | 0.671                         | 58 | 129.76<br>(122.90 to 136.62) | 129.14<br>(122.14 to 136.14) | -0.62<br>(-5.40 to 4.16)                    | 0.144                         | 2.58<br>(-5.01 to 10.18)                                                 | 0.433          | 0.174             |

Post hoc sub-analysis. Data presented as mean (95% Confidence Interval). All p-values were determined via Mixed ANOVA. All analyses had one within-group factor of Time (Baseline and 12-week). For within intervention group analysis, there was one between-subjects factor of Elevated Value at Baseline (Elevated and Normal). For analysis between intervention groups, there were two between-subject variables, Elevated Value at Baseline and Intervention Group (SOC and TRE). For analysis of combined groups (all participants), there was one between groups factor of Elevated Value at Baseline. p<0.05 (\*), p<0.01 (\*\*), p<0.001 (\*\*\*). See **Table 3** for other post hoc sub-analyses.

**Table S4. Changes in Lipoprotein Particle Size and Number, Related to Table 2 and Figure 4**

|                                    | SOC |                                 |                                 |                              | TRE           |    |                                 |                                 | Time X Group                |                |                             |               |
|------------------------------------|-----|---------------------------------|---------------------------------|------------------------------|---------------|----|---------------------------------|---------------------------------|-----------------------------|----------------|-----------------------------|---------------|
|                                    | N   | Baseline                        | 12-Week                         | Change                       | P-value       | N  | Baseline                        | 12-Week                         | Change                      | P-value        | Change (V3-V1) TRE-SOC      | P-Value       |
| <b>Particle Size</b>               |     |                                 |                                 |                              |               |    |                                 |                                 |                             |                |                             |               |
| HDL Particle Size, nm              | 61  | 8.87<br>(8.76 to 8.97)          | 8.91<br>(8.80 to 9.03)          | 0.05<br>(-0.02 to 0.12)      | 0.188         | 69 | 8.98<br>(8.80 to 9.15)          | 8.99<br>(8.83 to 9.14)          | 0.01<br>(-0.05 to 0.07)     | 0.763          | -0.04<br>(-0.13 to 0.05)    | 0.394         |
| LDL Particle Size, nm              | 61  | 20.98<br>(20.90 to 21.06)       | 21.02<br>(20.93 to 21.11)       | 0.04<br>(-0.3 to 0.10)       | 0.227         | 69 | 21.05<br>(20.92 to 21.18)       | 21.02<br>(20.91 to 21.13)       | -0.03<br>(-0.09 to 0.04)    | 0.374          | -0.07<br>(-0.16 to 0.02)    | 0.139         |
| VLDL Particle Size, nm             | 61  | 46.63<br>(45.91 to 47.35)       | 46.39<br>(45.67 to 47.10)       | -0.25<br>(-0.86 to 0.36)     | 0.419         | 69 | 47.50<br>(46.66 to 48.33)       | 46.16<br>(45.30 to 47.01)       | -1.34<br>(-2.20 to -0.49)   | <b>0.003**</b> | -1.10<br>(-2.16 to -0.03)   | <b>0.044*</b> |
| <b>Particle number</b>             |     |                                 |                                 |                              |               |    |                                 |                                 |                             |                |                             |               |
| HDL Particle Number, umol/L        | 61  | 35.16<br>(34.26 to 36.07)       | 34.12<br>(33.09 to 35.16)       | -1.04<br>(-1.82 to -0.26)    | <b>0.010*</b> | 68 | 35.34<br>(34.47 to 36.22)       | 35.32<br>(34.48 to 36.17)       | -0.02<br>(-0.76 to 0.72)    | 0.956          | 1.03<br>(-0.03 to 2.10)     | 0.061         |
| Large HDL Particle Number, umol/L  | 61  | 5.75<br>(5.05 to 6.44)          | 5.97<br>(5.17 to 6.77)          | 0.22<br>(-0.34 to 0.76)      | 0.401         | 69 | 6.57<br>(5.45 to 7.68)          | 6.77<br>(5.73 to 7.80)          | 0.20<br>(-0.16 to 0.55)     | 0.270          | -0.01<br>(-0.64 to 0.62)    | 0.934         |
| Small LDL Particle Number, nmol/L  | 61  | 531.62<br>(464.98 to 598.26)    | 494.09<br>(426.63 to 561.55)    | -37.53<br>(-83.12 to 8.06)   | 0.105         | 64 | 567.04<br>(499.38 to 634.71)    | 541.83<br>(471.77 to 611.88)    | -25.22<br>(-61.43 to 10.99) | 0.169          | 12.31<br>(-37.50 to 79.39)  | 0.672         |
| LDL Particle Number, nmol/L        | 61  | 1361.28<br>(1257.34 to 1465.22) | 1310.67<br>(1207.22 to 1414.13) | -50.61<br>(-116.98 to 15.77) | 0.133         | 69 | 1416.36<br>(1321.63 to 1511.10) | 1436.13<br>(1346.57 to 1525.69) | 19.77<br>(-38.13 to 77.66)  | 0.498          | 73.46<br>(-13.09 to 160.02) | 0.111         |
| Large VLDL Particle Number, nmol/L | 60  | 2.50<br>(1.91 to 3.09)          | 2.09<br>(1.76 to 2.43)          | -0.41<br>(-0.88 to 0.06)     | 0.089         | 69 | 2.66<br>(2.12 to 3.19)          | 2.45<br>(1.84 to 3.05)          | -0.21<br>(-0.84 to 0.42)    | 0.510          | 0.20<br>(-0.60 to 1.00)     | 0.627         |

Data presented as mean (95% Confidence Interval). Lipoprofile was assessed via Lipofit by NMR. Missing values are due to interference in the assay. Between-group differences were assessed by Mixed ANOVA for all participants that completed the 12-wk intervention. Within-group differences were assessed with paired t-tests.  $p < 0.05$  (\*),  $p < 0.01$  (\*\*),  $p < 0.001$  (\*\*\*)

**Table S5. Sleep and Quality of Life Questionnaires, Related to Figure 4**

|                                                                                                                                     | SOC |                           |                           |                           |                | TRE |                           |                           |                           |               | Time X Group             |         |
|-------------------------------------------------------------------------------------------------------------------------------------|-----|---------------------------|---------------------------|---------------------------|----------------|-----|---------------------------|---------------------------|---------------------------|---------------|--------------------------|---------|
|                                                                                                                                     | N   | Baseline                  | 12-Week                   | Change                    | P-value        | N   | Baseline                  | 12-Week                   | Change                    | P-value       | Change TRE-SOC (V3-V1)   | P-Value |
| <b>Pittsburg Sleep Quality Index (PSQI). Each item scored 0-3, total 0-21; a lower score indicates better sleep.</b>                |     |                           |                           |                           |                |     |                           |                           |                           |               |                          |         |
| Sleep Duration                                                                                                                      | 60  | 0.77<br>(0.56 to 0.97)    | 0.77<br>(0.56 to 0.98)    | 0.00<br>(-0.16 to 0.16)   | 1.000          | 68  | 0.85<br>(0.66 to 1.04)    | 0.96<br>(0.71 to 1.20)    | 0.10<br>(-0.15 to 0.35)   | 0.410         | 0.10<br>(-0.20 to 0.41)  | 0.503   |
| Sleep Disturbance                                                                                                                   | 62  | 1.45<br>(1.31 to 1.59)    | 1.32<br>(1.19 to 1.46)    | -0.12<br>(-0.28 to 0.03)  | 0.127          | 68  | 1.41<br>(1.28 to 1.54)    | 1.25<br>(1.13 to 1.37)    | -0.16<br>(-0.30 to -0.02) | <b>0.027*</b> | -0.03<br>(-0.24 to 0.18) | 0.757   |
| Sleep Latency                                                                                                                       | 64  | 1.52<br>(0.92 to 2.11)    | 1.04<br>(0.85 to 1.24)    | -0.46<br>(-1.07 to 0.14)  | 0.127          | 69  | 0.95<br>(0.77 to 1.14)    | 0.95<br>(0.76 to 1.16)    | 0.00<br>(-0.15 to 0.15)   | 1.000         | 0.47<br>(-0.13 to 1.07)  | 0.124   |
| Daytime Dysfunction                                                                                                                 | 64  | 0.95<br>(0.78 to 1.13)    | 0.84<br>(0.68 to 1.01)    | -0.11<br>(-0.26 to 0.04)  | 0.146          | 69  | 0.73<br>(0.57 to 0.91)    | 0.62<br>(0.46 to 0.78)    | -0.12<br>(-0.26 to 0.03)  | 0.117         | -0.01<br>(-0.21 to 1.20) | 0.950   |
| Sleep Efficiency                                                                                                                    | 60  | 0.80<br>(0.56 to 1.04)    | 0.72<br>(0.47 to 0.96)    | -0.08<br>(-0.36 to 0.19)  | 0.546          | 68  | 0.82<br>(0.59 to 1.06)    | 0.72<br>(0.47 to 0.97)    | -0.10<br>(-0.38 to 0.18)  | 0.467         | -0.02<br>(-0.41 to 0.33) | 0.921   |
| Sleep Quality                                                                                                                       | 65  | 1.40<br>(1.25 to 1.55)    | 1.23<br>(1.07 to 1.39)    | -0.17<br>(-0.34 to 0.003) | 0.055          | 68  | 1.32<br>(1.16 to 1.48)    | 1.19<br>(1.02 to 1.36)    | -0.13<br>(-0.33 to 0.07)  | 0.191         | 0.04<br>(-0.23 to 0.30)  | 0.782   |
| Meds                                                                                                                                | 64  | 0.52<br>(0.30 to 0.75)    | 0.42<br>(0.19 to 0.64)    | -0.11<br>(-0.31 to 0.09)  | 0.289          | 69  | 0.65<br>(0.40 to 0.91)    | 0.58<br>(0.35 to 0.81)    | -0.07<br>(-0.26 to 0.12)  | 0.450         | 0.03<br>(-0.24 to 0.31)  | 0.800   |
| Total Score                                                                                                                         | 56  | 6.52<br>(5.78 to 7.25)    | 6.33<br>(5.55 to 7.13)    | -0.18<br>(-0.90 to 0.54)  | 0.623          | 66  | 6.83<br>(6.09 to 7.58)    | 6.27<br>(5.47 to 7.07)    | -0.56<br>(-1.29 to 0.17)  | 0.128         | -0.38<br>(-1.40 to 0.64) | 0.461   |
| <b>Epworth Sleepiness Scale (ESS). Scores from 0-24; a lower score is better, means less sleepy.</b>                                |     |                           |                           |                           |                |     |                           |                           |                           |               |                          |         |
| ESS score                                                                                                                           | 65  | 9.08<br>(8.06 to 10.11)   | 8.69<br>(7.62 to 9.57)    | -0.39<br>(-0.99 to 0.21)  | 0.195          | 70  | 8.26<br>(7.36 to 9.15)    | 7.63<br>(6.73 to 8.52)    | -0.63<br>(-1.35 to 0.09)  | 0.087         | -0.24<br>(-1.17 to 0.70) | 0.608   |
| ESS score >5 at baseline                                                                                                            | 54  | 10.43<br>(9.49 to 11.36)  | 9.56<br>(8.50 to 10.61)   | -0.87<br>(-1.49 to -0.25) | <b>0.007**</b> | 52  | 9.79<br>(8.94 to 10.63)   | 8.69<br>(7.69 to 9.69)    | -1.10<br>(-2.00 to -0.19) | <b>0.019*</b> | -0.23<br>(-1.30 to 0.85) | 0.442   |
| <b>Quality of Life: 36-Item Short Form Survey (SF-36). Each item scored 0-100; a higher score indicates better health/wellness.</b> |     |                           |                           |                           |                |     |                           |                           |                           |               |                          |         |
| Physical Functioning                                                                                                                | 65  | 94.44<br>(91.22 to 97.65) | 97.46<br>(95.76 to 99.16) | 3.03<br>(-0.003 to 6.05)  | 0.050          | 70  | 96.73<br>(94.92 to 98.55) | 97.11<br>(95.80 to 98.42) | 0.38<br>(-1.15 to 1.91)   | 0.623         | -2.64<br>(-5.94 to 0.64) | 0.114   |
| Role Limitations Due to Physical Health                                                                                             | 65  | 86.15<br>(79.05 to 93.25) | 84.87<br>(77.56 to 92.18) | -1.28<br>(-9.50 to 6.94)  | 0.756          | 70  | 93.93<br>(89.34 to 98.52) | 94.88<br>(90.96 to 98.80) | 0.95<br>(-4.92 to 6.83)   | 0.747         | 2.23<br>(-7.67 to 12.14) | 0.656   |

|                                            |    |                            |                           |                             |                |    |                           |                           |                          |                |                          |               |
|--------------------------------------------|----|----------------------------|---------------------------|-----------------------------|----------------|----|---------------------------|---------------------------|--------------------------|----------------|--------------------------|---------------|
| Role Limitations due to Emotional Problems | 64 | 97.40<br>(94.70 to 100.10) | 84.90<br>(77.20 to 92.59) | -12.50<br>(-19.84 to -5.16) | <b>0.001**</b> | 70 | 95.71<br>(91.67 to 99.76) | 93.81<br>(88.69 to 98.93) | -1.90<br>(-8.24 to 4.43) | 0.550          | 10.60<br>(1.04 to 20.16) | <b>0.030*</b> |
| Energy/Fatigue                             | 65 | 61.60<br>(56.98 to 66.22)  | 58.54<br>(53.22 to 63.86) | -3.06<br>(-7.46 to 1.35)    | 0.170          | 70 | 65.00<br>(60.97 to 69.03) | 65.46<br>(60.85 to 70.08) | 0.46<br>(-3.26 to 4.18)  | 0.804          | 3.52<br>(-2.16 to 9.21)  | 0.222         |
| Emotional Well-Being                       | 64 | 82.19<br>(79.57 to 84.81)  | 77.13<br>(73.13 to 81.12) | -5.06<br>(-8.75 to -1.37)   | <b>0.008**</b> | 70 | 84.54<br>(82.04 to 87.05) | 83.94<br>(81.53 to 86.35) | -0.60<br>(-2.80 to 1.60) | 0.588          | 4.46<br>(0.29 to 8.63)   | <b>0.036*</b> |
| Social Functioning                         | 65 | 93.38<br>(90.47 to 96.30)  | 90.35<br>(86.32 to 94.37) | -3.04<br>(-3.04 to -3.04)   | 0.131          | 70 | 94.25<br>(91.59 to 96.91) | 93.43<br>(90.42 to 96.44) | -0.82<br>(-4.12 to 2.48) | 0.621          | 2.22<br>(-2.87 to 7.30)  | 0.390         |
| Pain                                       | 65 | 80.77<br>(76.46 to 85.08)  | 78.15<br>(73.66 to 82.65) | -2.62<br>(-6.51 to 1.28)    | 0.185          | 70 | 84.43<br>(81.47 to 87.39) | 85.14<br>(81.61 to 88.67) | 0.71<br>(-2.97 to 4.40)  | 0.700          | 3.33<br>(-1.98 to 8.64)  | 0.217         |
| General Health                             | 65 | 75.72<br>(71.79 to 79.66)  | 74.79<br>(70.93 to 78.65) | -0.93<br>(-4.02 to 2.15)    | 0.547          | 70 | 79.73<br>(76.66 to 82.80) | 78.77<br>(75.54 to 82.00) | -0.96<br>(-3.39 to 1.46) | 0.431          | -0.03<br>(-3.92 to 3.86) | 0.988         |
| Health Change                              | 62 | 53.24<br>(48.29 to 58.19)  | 58.87<br>(53.35 to 64.40) | 5.62<br>(-1.31 to 12.57)    | 0.110          | 68 | 54.41<br>(48.89 to 59.94) | 62.87<br>(57.69 to 68.04) | 8.46<br>(2.58 to 14.33)  | <b>0.005**</b> | 2.83<br>(-6.13 to 11.78) | 0.533         |

Data presented as mean (95% Confidence Interval). Between-group differences were assessed by Mixed ANOVA. Within-group differences were assessed with paired t-tests.  $p < 0.05$  (\*),  $p < 0.01$  (\*\*).

**Table S6. Changes in Mediterranean Diet from 24-hour Dietary Recall Related to Table 2 and STAR Methods**

| Line # | Measurement                                                               | TRE      |         | SOC      |         |
|--------|---------------------------------------------------------------------------|----------|---------|----------|---------|
|        |                                                                           | Baseline | 6 weeks | Baseline | 6 weeks |
| 1      | Number of participants                                                    | 69       | 69      | 66       | 66      |
| 2      | Number of food and beverages                                              | 1159     | 971     | 1143     | 861     |
| 3      | Average number of food/beverage descriptors per participant               | 16.8     | 14.1    | 17.3     | 13.0    |
| 4      | Number of food/beverage descriptors representing fruits                   | 139      | 162     | 164      | 141     |
| 5      | Number of food/beverage descriptors representing vegetables               | 229      | 214     | 212      | 159     |
| 6      | Number of food/beverage descriptors representing Fish                     | 14       | 16      | 11       | 15      |
| 7      | Olive oil                                                                 | 13       | 16      | 7        | 16      |
| 8      | Total number of food descriptors representing Med Diet (sum of lines 4-7) | 395      | 408     | 394      | 331     |
| 9      | Percent of all food/beverages that represent Med diet (line 8/2, %)       | 34%      | 42%     | 34%      | 38%     |

Data were taken from the 24-hour dietary recall with a dietitian. Med Diet = Mediterranean Diet.

We analyzed the 24-h dietary recall data collected by a trained dietitian. After parsing dietary recall data for fruits, vegetables, olive oil, fish, etc., that represent a Mediterranean diet, we found that these categories increased in both groups. The percent of Med-food names increased from 34% to 42% in TRE and 34% to 38% in SOC. However, we also recognize the limitation of the approach for the following examples. A mango smoothie prepared at a fire station may appear to increase the intake of fruit, but it also increases the intake of simple sugar and it was impossible to find what fraction of energy intake came from fruit vs. added sugar. Similarly, leafy vegetables in a steak salad may represent a med-diet, while red meat is not a preferred med-diet component. In both cases, we included fruit and leafy vegetables in our count of med-diet descriptors. However, the relative contribution of these components to the med-diet is debatable.
